# Supplementary material for: Stabilization of a hyaluronate-associated gene delivery system using calcium ions
Source: Royal Society of Chemistry journal article supplement (doi:10.1039/c4bm00012a), 2014-01-01
Supplement: c4bm00012a1.pdf [file c4bm00012a1.pdf]

## Stabilization of a hyaluronate-associated gene delivery system using calcium ions

Min Feng<sup>1,†</sup>, Basma M. Ibrahim<sup>2,†</sup>, Erin M. Wilson<sup>2</sup>, Kyung-Oh Doh<sup>2</sup>, Brandon Bergman<sup>2</sup>, Christopher Park<sup>2</sup>, and Yoon Yeo<sup>2,3,4\*</sup>

### Supporting Figures

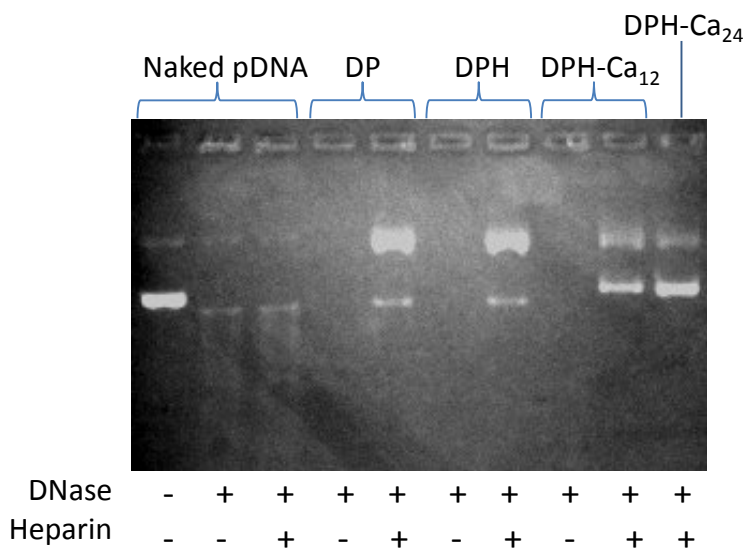

**Supporting Fig. 1.** Stability of naked pDNA, DP, DPH, and DPH-Ca complexes in the presence of DNase and heparin.

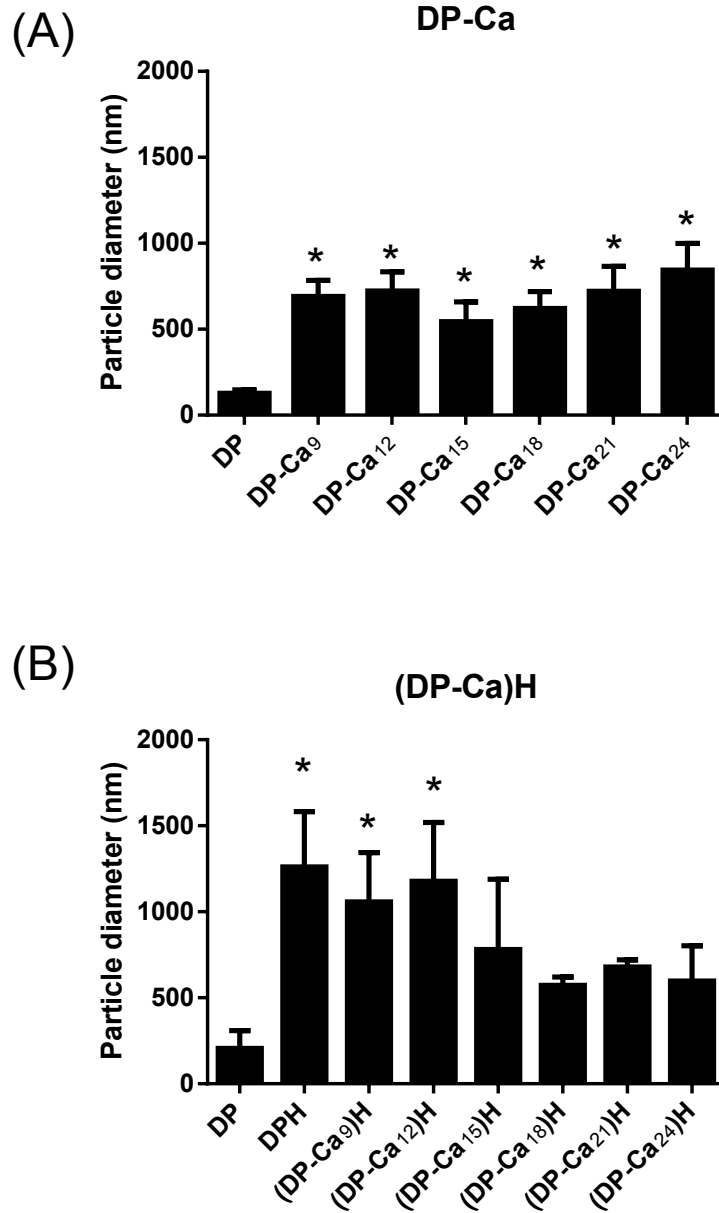

**Supporting Fig. 2.** (A) Particle sizes of DP-Ca complexes prepared with different amounts of CaCl<sub>2</sub> (numbers indicate  $\mu\text{mol}$  of CaCl<sub>2</sub> per 1  $\mu\text{g}$  pDNA). All the DP-Ca were significantly larger than DP (\*:  $p < 0.05$  by Tukey test); no significant difference among DP-Ca's. (B) Particle sizes of (DP-Ca)H complexes, where DP-Ca complexes were first formed varying the amount of CaCl<sub>2</sub> (numbers indicate  $\mu\text{mol}$  of CaCl<sub>2</sub> per 1  $\mu\text{g}$  pDNA), and HA was added subsequently (1  $\mu\text{g}$  of HA per 1  $\mu\text{g}$  pDNA). \*:  $p < 0.05$  vs. DP by Tukey test; no significant difference between DPH vs. (DP-Ca)H's.

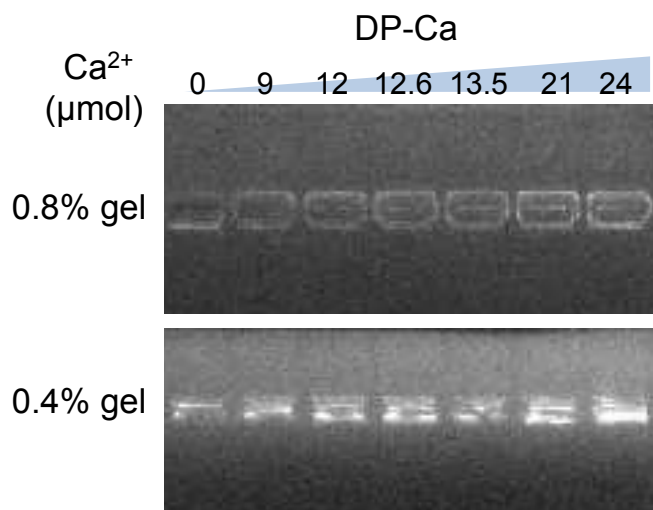

**Supporting Fig. 3.** Gel retardation assay of DP-Ca formed with different amounts of Ca<sup>2+</sup>, performed at two gel concentrations (0.8% and 0.4% agarose gels).
